# Supplementary material for: NMOF self-templating synthesis of hollow porous metal oxides for enhanced lithium-ion battery anodes
Source: Royal Society of Chemistry journal article supplement (doi:10.1039/c8nj04117b), 2018-01-01
Supplement: c8nj04117b1.pdf [file c8nj04117b1.pdf]

## Supporting Information

# NMOFs self-templating synthesis of hollow porous metal oxides for enhanced lithium-ion battery anodes

*Rui Dang <sup>\*a</sup>, Xilai Jia <sup>b</sup>, Peng Wang <sup>b</sup>, Hongyi Gao <sup>b</sup>*

a. Northwest Institute For Nonferrous Metal Research, 96 Weiyang Road, Weiyang district, 710016, P.R. China.

b. School of Materials Science and Engineering, University of Science and Technology Beijing, Beijing 100083, People's Republic of China

### Corresponding Author

Northwest Institute For Nonferrous Metal Research, 96 Weiyang Road, Weiyang district, 710016, P.R. China.

\*Email: dr0501@163.com (Rui Dang)

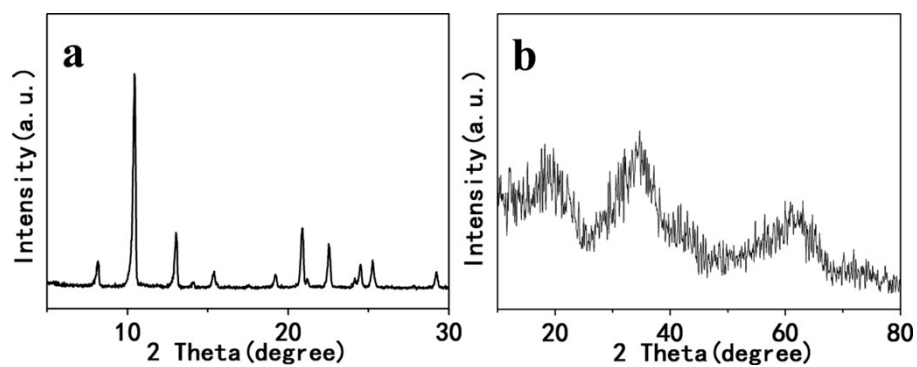

**Fig. S1.** XRD patterns of a) Fe-MIL-88A, and b) Fe-MIL-88A@Fe(OH)<sub>3</sub>.

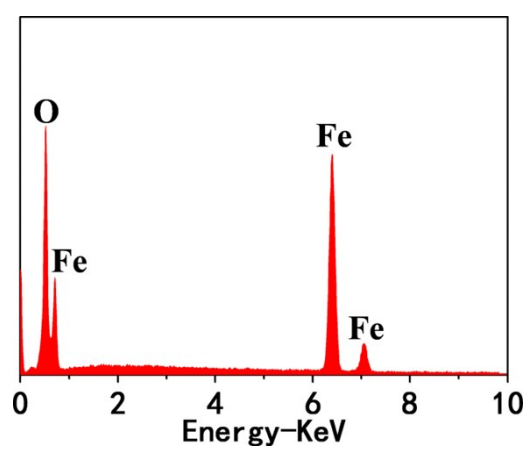

**Fig. S2.** EDX patterns of hollow porous Fe<sub>2</sub>O<sub>3</sub> hexagonal nanorods

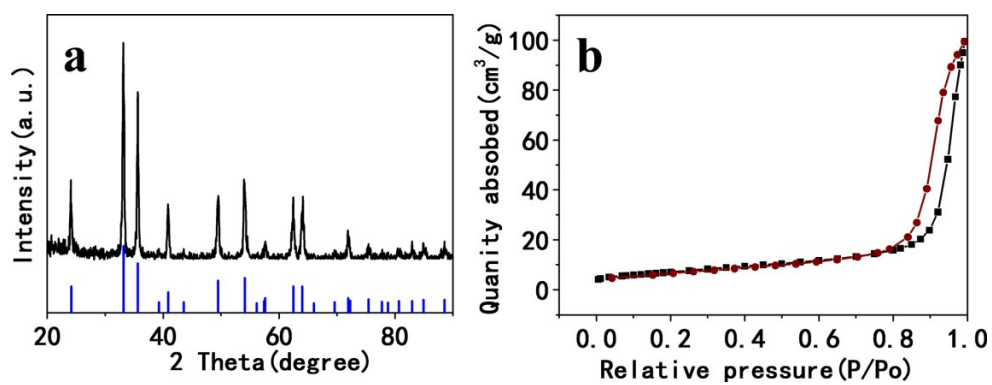

**Fig. S3.** a) XRD pattern and b) N<sub>2</sub>-sorption isotherms of the Fe-MIL-88A direct calcination in air.

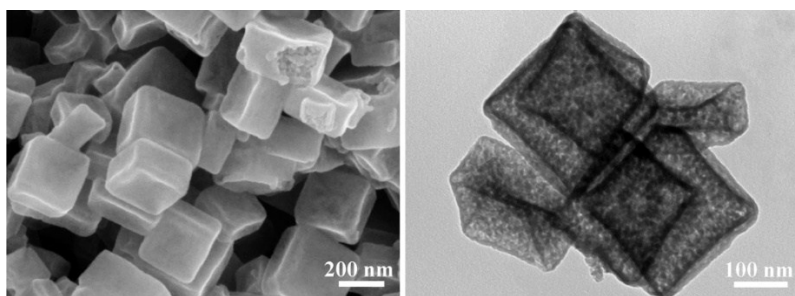

**Fig. S4.** a) SEM images, b) TEM images of hollow porous  $\text{TiO}_2$  nanoboxes derived from Ti-MIL-125 by the similar strategy.

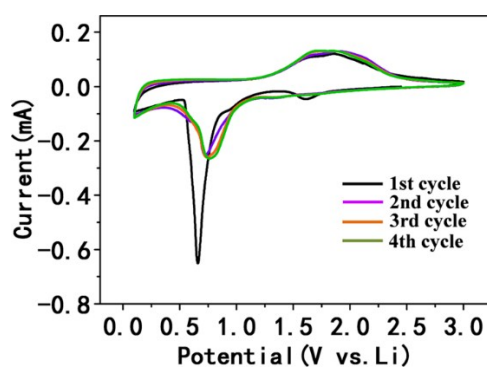

**Fig. S5.** a) CV curves of hollow porous  $\text{Fe}_2\text{O}_3$  hexagonal nanorods.

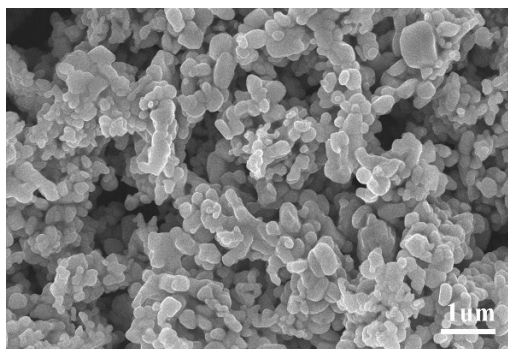

**Fig. S6** SEM image of the commercial  $\text{Fe}_2\text{O}_3$ .

**Table 1.** Comparison of various  $\text{Fe}_2\text{O}_3$  materials as anodes for LIBs

| Materials                                      | Current density | Cycle number | Specific capacity | Ref       |
|------------------------------------------------|-----------------|--------------|-------------------|-----------|
| $\text{Fe}_2\text{O}_3$ nanoflakes             | 0.05C           | 50           | 1095 mAh/g        | 53        |
| $\text{Fe}_2\text{O}_3$ nanoflakes             | 0.1C            | 80           | 680 mAh/g         | 54        |
| $\text{Fe}_2\text{O}_3$ nanorods               | 0.2C            | 30           | 908 mAh/g         | 55        |
| $\text{Fe}_2\text{O}_3$ nanorods               | 0.1C            | 30           | 800 mAh/g         | 56        |
| $\text{Fe}_2\text{O}_3$ nanorods               | 0.1C            | 50           | 893 mAh/g         | 57        |
| Hollow porous $\text{Fe}_2\text{O}_3$ nanorods | 0.1C            | 100          | 1219 mAh/g        | This work |
